# Supplementary material for: The Broader Economic Value of School Feeding Programs in Low- and Middle-Income Countries: Estimating the Multi-Sectoral Returns to Public Health, Human Capital, Social Protection, and the Local Economy
Source: PubMed Central journal article supplement (PMC7744483; doi:10.3389/fpubh.2020.587046), 2020-12-03
Supplement: Presentation_1.pdf [file Presentation_1.pdf]

## Supplementary appendix

The broader economic value of school feeding programs in low- and middle-income countries:  
Estimating the multi-sectoral returns to public health, human capital, social protection and the  
local economy

by

Stéphane Verguet, Paulina Limasalle, Averi Chakrabarti, Arif Husain, Carmen Burbano,  
Lesley Drake, and Donald A.P. Bundy

We report in this supplementary appendix findings for our benefit-cost analysis when alternative assumptions for the imputed annual wages (in place of gross national income (GNI) per capita in the main text) were used, namely with: gross domestic product (GDP) per capita (2012 USD); a national income per capita set at \$1,000 or \$5,000 which approximates the World Bank cutoffs for low-income and lower-middle-income countries [1]; and minimum wages (Table S1). Notably, the values of \$1,000 and \$5,000 are consistent with previous cross-sectoral benefit-cost analyses conducted by the Copenhagen Consensus exercise [2].

**Table S1.** Gross domestic product (GDP) per capita and annual minimum wage for the 14 countries examined in our benefit-cost analysis.

| Country       | GDP per capita (2012 USD) | Minimum wage (2012 USD) |
|---------------|---------------------------|-------------------------|
| Botswana      | 7,070                     | 959                     |
| Brazil        | 12,370                    | 3,822                   |
| Cape Verde    | 3,448                     | 1,218                   |
| Chile         | 15,352                    | 4,625                   |
| Côte d'Ivoire | 1,243                     | 982                     |
| Ecuador       | 5,682                     | 3,504                   |
| Ghana         | 1,588                     | 741                     |
| India         | 1,444                     | 936                     |
| Kenya         | 1,137                     | 1,770                   |
| Mali          | 779                       | 536                     |
| Mexico        | 10,242                    | 1,195                   |
| Namibia       | 5,942                     | 2,894                   |
| Nigeria       | 2,747                     | 1,162                   |
| South Africa  | 7,501                     | 4,002                   |

To derive an estimate of minimum wage (MW) per country, we used a variety of estimates. For African countries, monthly average MW estimates from a study on wage schedules were used [3]. Botswana, Ghana, Kenya, and South Africa all had a reported monthly MW and these MWs were further multiplied by 12 to get annual estimates. The other African countries (Cape Verde, Côte d’Ivoire, Mali, Namibia, and Nigeria) did not have a reported MW, so the mean monthly MW for either low-income or lower-middle-income economies was used and multiplied by 12 to get an annual estimate. For Brazil, Chile, and Mexico, we used MW estimates as reported by the OECD [4]; for India, we used a proxy for the MW (137 Rupees per day) converted to USD drawing from [5]; and for Ecuador, we used a reported basic unified minimum wage in 2012 USD from [6].

Subsequently, the education benefits tied to future wages to be earned in adult life (assuming 45 years of income, kicking in 5 years into the future, discounted at 3% per year) could be computed with the following (consistent with the approach described in the main text):

$$FW = I_c * A * \sum_{i=5}^{49} (1 + r)^i, \quad (S.1)$$

where  $I_c$  is either country GDP per capita or minimum wage or \$1,000 or \$5,000. As a result, we could derive the increase in future wages capturing the educational benefits of SF programs (Table S2). Likewise, we could derive updated money-metric estimates for the health and nutrition gains (Table S3).

**Table S2.** Estimated educational benefits expressed in future wages gained through school feeding programs in three world regions (captured via 14 countries), with the use of different proxies for income per capita.

| <b>Outcome/region</b>                              | <b>Latin America</b>      | <b>South Asia</b> | <b>Sub-Saharan Africa</b> | <b>All</b>            |
|----------------------------------------------------|---------------------------|-------------------|---------------------------|-----------------------|
| <i>GDP per capita (2012 USD)</i>                   |                           |                   |                           |                       |
| Total additional future wages gained (\$ millions) | 110,235                   | 28,946            | 17,731                    | 156,911               |
| Per capita additional future wages gained (\$)     | 2,117<br>(1,003 to 2,709) | 255<br>(N/A)      | 813<br>(137 to 1,324)     | 837<br>(137 to 2,709) |
| <i>\$1,000 per capita</i>                          |                           |                   |                           |                       |
| Total additional future wages gained (\$ millions) | 9,189                     | 20,046            | 3,848                     | 33,083                |
| Per capita additional future wages gained (\$)     | 176                       | 176               | 176                       | 176                   |
| <i>\$5,000 per capita</i>                          |                           |                   |                           |                       |
| Total additional future wages gained (\$ millions) | 45,943                    | 100,228           | 19,240                    | 165,413               |
| Per capita additional future wages gained (\$)     | 880                       | 880               | 880                       | 880                   |
| <i>Minimum wage (2012 USD)</i>                     |                           |                   |                           |                       |
| Total additional future wages gained (\$ millions) | 32,452                    | 18,758            | 8,927                     | 60,137                |
| Per capita additional future wages gained (\$)     | 623<br>(211 to 816)       | 165<br>(N/A)      | 409<br>(95 to 706)        | 321<br>(95 to 816)    |

**Table S3.** Estimated money-metric gains corresponding to the number of soil-transmitted helminth (STH) cases and anemia (moderate) cases averted. Three world regions (captured via 14 countries).

| <b>Outcome/region</b>                  | <b>Latin America</b> | <b>South Asia</b> | <b>Sub-Saharan Africa</b> | <b>All</b>          |
|----------------------------------------|----------------------|-------------------|---------------------------|---------------------|
| <i>GDP per capita (2012 USD)</i>       |                      |                   |                           |                     |
| Total money-metric value (\$ millions) | 14,573               | 5,934             | 3,156                     | 23,663              |
| Per capita money-metric value (\$)     | 280<br>(133 to 358)  | 52<br>(N/A)       | 145<br>(34 to 198)        | 126<br>(34 to 358)  |
| <i>\$1,000 per capita</i>              |                      |                   |                           |                     |
| Total money-metric value (\$ millions) | 1,215                | 4,109             | 777                       | 6,101               |
| Per capita money-metric value (\$)     | 23                   | 36                | 36<br>(26 to 44)          | 33<br>(23 to 44)    |
| <i>\$5,000 per capita</i>              |                      |                   |                           |                     |
| Total money-metric value (\$ millions) | 6,074                | 20,546            | 3,886                     | 30,505              |
| Per capita money-metric value (\$)     | 117                  | 181               | 178<br>(130 to 220)       | 165<br>(115 to 220) |
| <i>Minimum wage (2012 USD)</i>         |                      |                   |                           |                     |
| Total money-metric value (\$ millions) | 4,290                | 3,846             | 1,558                     | 9,694               |
| Per capita money-metric value (\$)     | 82<br>(28 to 108)    | 34<br>(N/A)       | 71<br>(23 to 106)         | 52<br>(23 to 108)   |

Therefore, when using alternative values of income per capita, the total money-metric gains linked to education benefits could decrease to \$33,083 million (\$1,000 per wage) or \$60,137 (minimum wage). This then leads to a partial benefit-cost ratio as low as 3.1 vis-à-vis the sole education sector. Likewise, the total money-metric gains linked to health and nutrition benefits could decrease to \$6,101 million (\$1,000 per wage) or \$9,694 (minimum wage). This then leads to a partial benefit-cost ratio as low as 0.6 for the health and nutrition sector.

## References

1. World Bank. World Bank Country and Lending Groups. Available at: <https://datahelpdesk.worldbank.org/knowledgebase/articles/906519-world-bank-country-and-lending-groups>
2. Copenhagen Consensus Center. Available at: <https://www.copenhagenconsensus.com>
3. Borat H, Kanbur R, Stanwix B. Minimum wages in sub-Saharan Africa: a primer. The World Bank Research Observer 2017; 32:21-74.
4. Organisation for Economic Co-Operation and Development. Real minimum wages. Available at: <https://stats.oecd.org/Index.aspx?DataSetCode=RMW> (accessed March 3, 2019).
5. Ministry of Labour and Employment (2017, June 7). India's revised national floor level minimum wage. Available at: <https://labour.gov.in/gazette-notification>
6. Wong SA. Minimum wage impacts on wages and hours worked of low-income workers in Ecuador. World Development 2019; 116:77-99.
